# Supplementary material for: Comparison of bacterial microbiota of the predatory mite Neoseiulus cucumeris (Acari: Phytoseiidae) and its factitious prey Tyrophagus putrescentiae (Acari: Acaridae)
Source: PubMed Central journal article supplement (PMC5428342; doi:10.1038/s41598-017-00046-6), 2017-01-31
Supplement: 41598_2017_46_MOESM1_ESM.pdf [file 41598_2017_46_MOESM1_ESM.pdf]

## Supplementary material

Pekas A, Palevsky E, Sumner JC, Perotti AM, Nesvorna M, Hubert J.

**Comparison of bacterial microbiota of the predatory mite *Neoseiulus cucumeris* (Acari: Phytoseiidae) and its factitious prey *Tyrophagus putrescentiae* (Acari: Acaridae)**

Scientific Reports



**Table S2. The description of the samples of predatory (*Neoseiulus cucumeris*) and prey (*Tyrophagus putrescentiae*) mites and the variables tested in the study.** The barcodes and samples ID in GenBank are provided. The sequences were deposited in SRA SRP074673 as bioproject PRJNA321085 in GenBank.

| Sample code | Date collected | Species                 | Description                                    | factor1 | factor2 | Sample ID.   | Barcodes |
|-------------|----------------|-------------------------|------------------------------------------------|---------|---------|--------------|----------|
| BB1         | 3/26/2015      | <i>N. cucumeris</i>     | Mass-production population                     | pred    | 1       | SAMN04959061 | CTCGACGA |
| BB2         | 3/26/2015      | <i>N. cucumeris</i>     | Mass-production population                     | pred    | 1       | SAMN04959062 | CTCGTACG |
| BB3         | 3/26/2015      | <i>N. cucumeris</i>     | Mass-production population                     | pred    | 1       | SAMN04959063 | CTCGTGAT |
| BB4         | 3/31/2015      | <i>N. cucumeris</i>     | Lab population with disease symptoms           | pred    | 2       | SAMN04959064 | CTCTAGCG |
| BB5         | 3/31/2015      | <i>N. cucumeris</i>     | Lab population with disease symptoms           | pred    | 2       | SAMN04959065 | CTCTATTT |
| BB6         | 3/31/2015      | <i>N. cucumeris</i>     | Lab population with disease symptoms           | pred    | 2       | SAMN04959066 | CTGCGTTG |
| Tyro 1      | 3/31/2015      | <i>T. putrescentiae</i> | Pure culture (no <i>N. cucumeris</i> )         | prey    | 3       | SAMN04959080 | CTCTGTGT |
| Tyro 2      | 3/31/2015      | <i>T. putrescentiae</i> | Pure culture (no <i>N. cucumeris</i> )         | prey    | 3       | SAMN04959072 | CTGAATCA |
| Tyro 3      | 3/31/2015      | <i>T. putrescentiae</i> | Pure culture (no <i>N. cucumeris</i> )         | prey    | 3       | SAMN04959073 | CTGACCCG |
| Tyro 4      | 3/31/2015      | <i>T. putrescentiae</i> | Mites from <i>N. cucumeris</i> mass-production | prey    | 4       | SAMN04959074 | CTGACGGC |
| Tyro 5      | 3/31/2015      | <i>T. putrescentiae</i> | Mites from <i>N. cucumeris</i> mass-production | prey    | 4       | SAMN04959075 | CTGAGCGT |
| Tyro 6      | 3/31/2015      | <i>T. putrescentiae</i> | Mites from <i>N. cucumeris</i> mass-production | prey    | 4       | SAMN04959076 | CTGATAAC |
| Tyro 7      | 3/31/2015      | <i>T. putrescentiae</i> | Mites from <i>N. cucumeris</i> mass-production | prey    | 4       | SAMN04959077 | CTGATAGC |
| Tyro 8      | 3/31/2015      | <i>T. putrescentiae</i> | Mites from <i>N. cucumeris</i> mass-production | prey    | 4       | SAMN04959078 | CTGCCGCC |
| Tyro 9      | 3/31/2015      | <i>T. putrescentiae</i> | Mites from <i>N. cucumeris</i> mass-production | prey    | 4       | SAMN04959079 | CTGCGAGG |
